# Supplementary material
Source: PubMed Central journal article supplement (PMC8500828)
Supplement: 253_2021_11608_MOESM1_ESM.pdf [file 253_2021_11608_MOESM1_ESM.pdf]

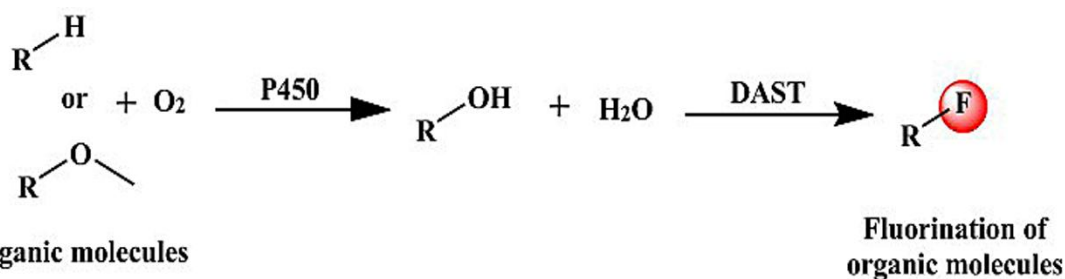

25

26 **Figure S1.** The selective fluorination process catalyzed by cytochrome  
 27 P450 enzyme and diethylaminosulfur trifluoride (DAST).

28

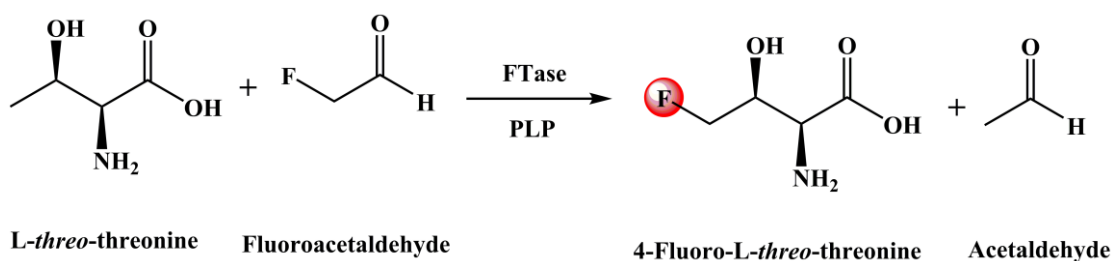

29

30 **Figure S2.** Synthesis of 4-fluoro-*L-threo-threonine* employing  
 31 4-fluorothreonine transaldolase (FTase).

32

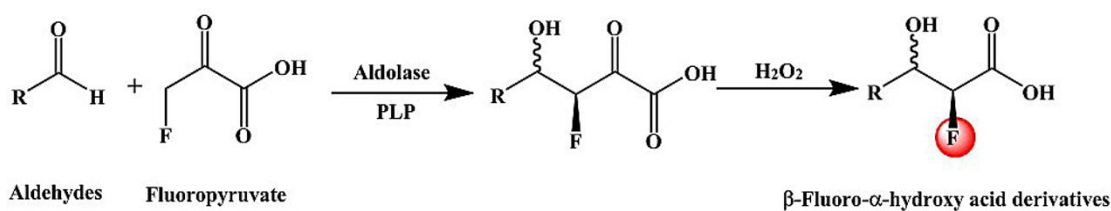

33

34 **Figure S3.** Chemo-enzymatic synthesis of  $\beta$ -fluoro- $\alpha$ -hydroxy acid  
 35 derivatives catalyzed by aldolase and H<sub>2</sub>O<sub>2</sub>.

36

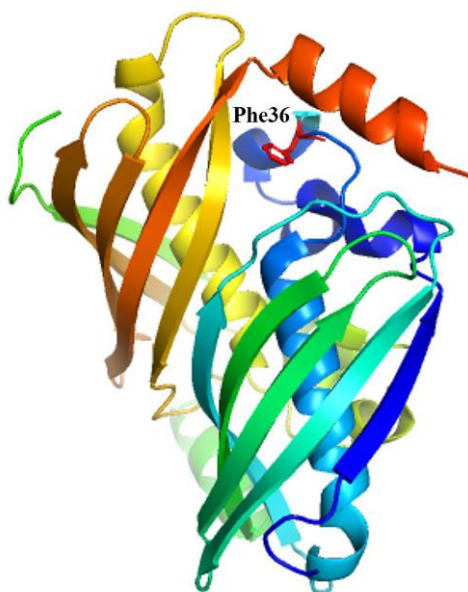

37

38 **Figure S4.** Structural of FLK. Phe36 is shown in red.

39

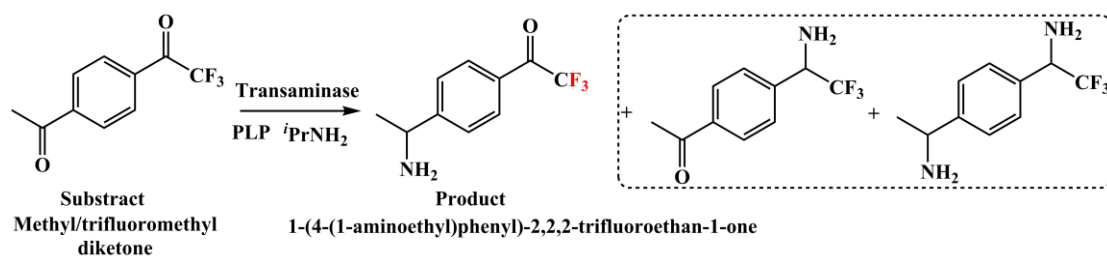

40

41 **Figure S5.** Selective amination catalyzed by transaminase. The dashed

42 box is the theoretical product but has not been generated in practice.

43

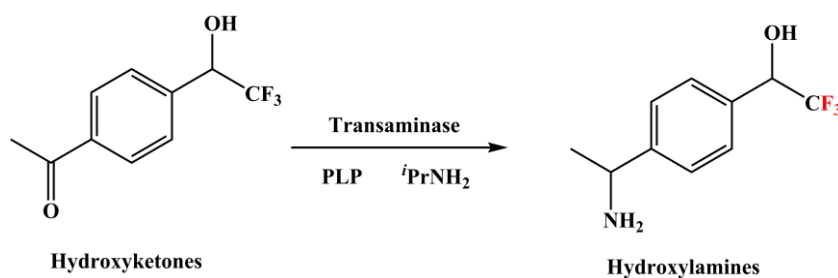

44

45 **Figure S6.** Fluorinated hydroxylamines were obtained by transaminase.

46

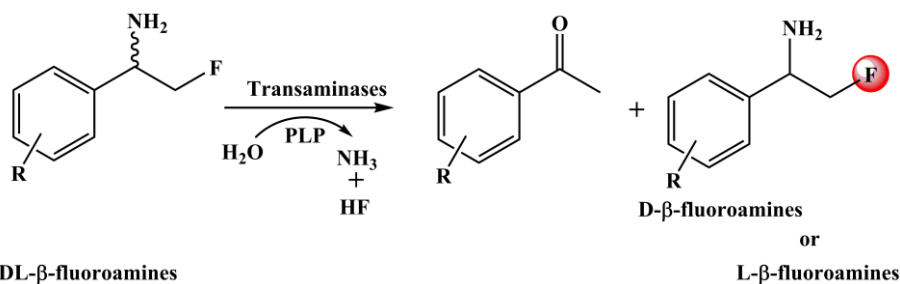

47

DL-β-fluoroamines

D-β-fluoroamines  
or  
L-β-fluoroamines

48 **Figure S7.** β-Fluoroamines were obtained by kinetic resolution through  
49 transaminase-mediated hydrodefluorination/deamination reactions.

50

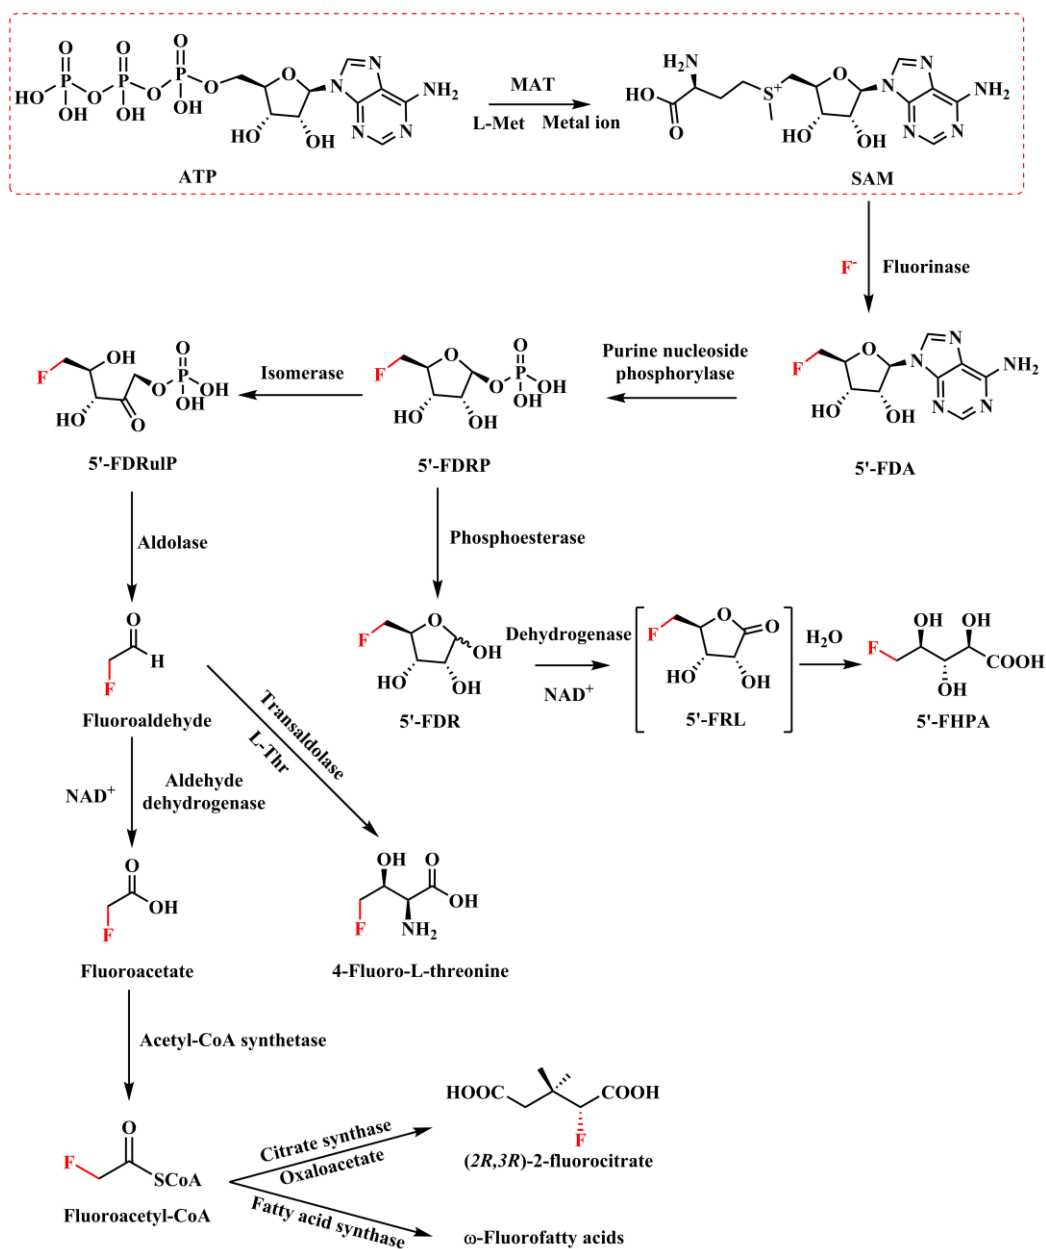

51

52 **Figure S8.** The biosynthetic pathway of fluorinated metabolites identified  
 53 from *Streptomyces*. S-adenosyl-L-methionine (SAM);  
 54 5'-fluoro-5'-deoxyadenosine (5'-FDA);  
 55 5'-fluoro-5'-deoxy-ribose-1-phosphate (5'-FDRP);  
 56 5'-fluoro-5'-deoxy-ribulose-phosphate (5'-FDRuIP);  
 57 5'-fluoro-5'-deoxy-D-ribose (5'-FDR);  
 58 5'-fluoro-5'-deoxy-D-ribo- $\gamma$ -lactone (5'-FRL);  
 59 (2R3S4S)-5'-fluoro-2,3,4-trihydroxypentanoic acid (5'-FHPA). The  
 60 metabolic pathway in the red dashed box is a new pathway newly  
 61 discovered in our laboratory. Related research results will be published  
 62 elsewhere.

63

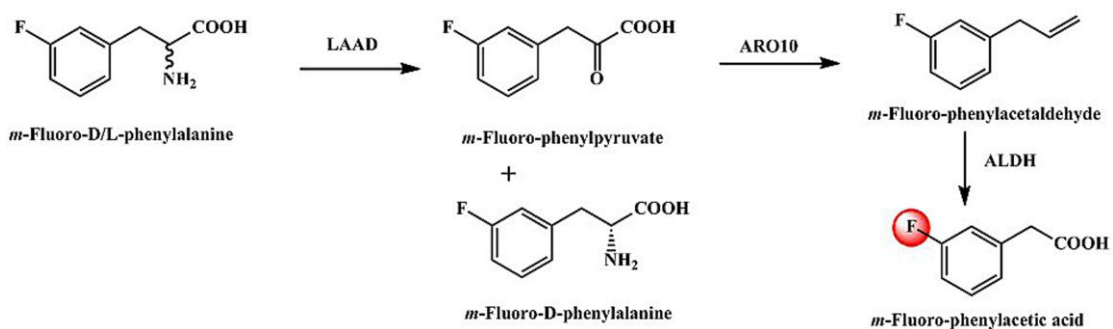

64

65 **Figure S9.** *m*-Fluoro-phenylacetic acid was synthesized by LAAD,  
 66 ARO10, and ALDH.

67

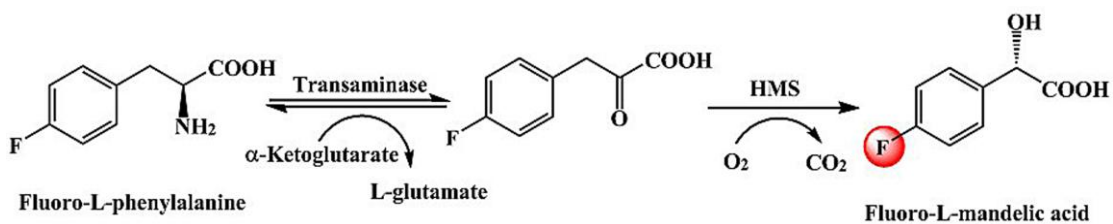

68

69 **Figure S10.** Biosynthesis fluoro-L-mandelic acid catalyzed by aromatic  
 70 amino acid transaminase and HMS.

71

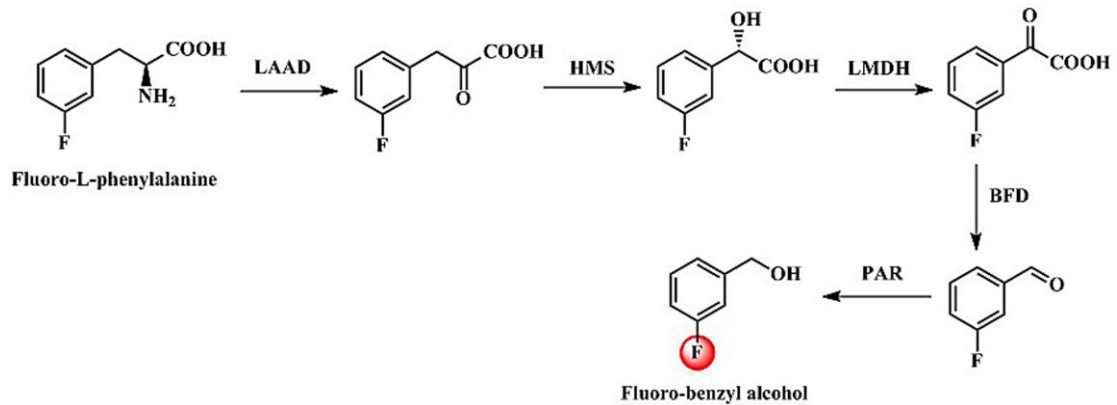

72

73 **Figure S11.** Biosynthesis fluoro-benzyl alcohol catalyzed by LAAD, HMS,  
 74 LMDH, BFD and PAR.

75

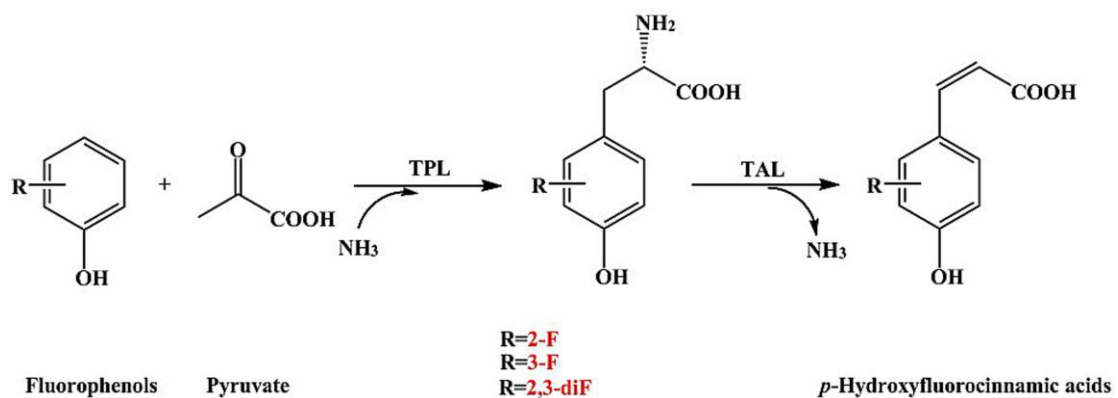

76

77 **Figure S12.** *p*-Hydroxyfluorocinnamic acids were obtained by TPL and  
 78 TAL.

79

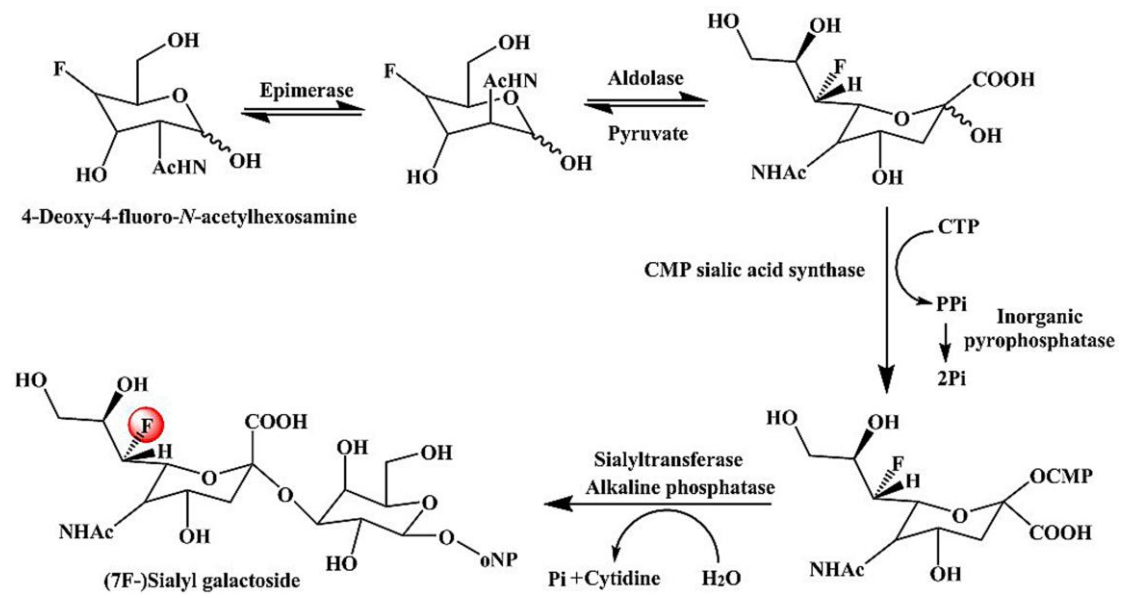

80

81 **Figure S13.** Multi-enzyme synthesis route of (7F-)sialyl galactoside.

82 *o*-Nitrophenol=oNP.

83

|                           |                                             |     |
|---------------------------|---------------------------------------------|-----|
| Streptomyces_xinghaiensis | MSADPTQRPIIGFMSDLGTTDDSV AQCRGLMHSICPGVTIV  | 40  |
| Actinopolyspora_mzabensis | .....MSDLGTTDDSV AQCRGLMMSICQDVTIV          | 27  |
| Streptomyces_sp.MA37      | MAANGSQRPIIAFMSDLGTTDDSV AQCRGLMHSICPGVTIV  | 40  |
| Actinoplanes_sp.N902-109  | ..MPANGNPPIIAFMSDLGTTDDSV AQCRGLMMSICPGVTIV | 38  |
| Nocardia_brasiliensis     | .....MSDLGITDDSV AQCRGLMMSVCGEDVTIV         | 27  |
| Streptomyces_cattleya     | MAANSTRRPIIAFMSDLGTTDDSV AQCRGLMYSICPGDVTIV | 40  |
| Consensus                 | msdlg tddsvaqckglm s c vt                   |     |
|                           |                                             |     |
| Streptomyces_xinghaiensis | IDVCHSMTPWDVEEGARYIVDLPRFFPEGTVFATTYPAT     | 80  |
| Actinopolyspora_mzabensis | VDVCHSMEPNWVEEGARYIVDLPRFFPEGTVFATTYPAT     | 67  |
| Streptomyces_sp.MA37      | VDVCHSMTPWDVEEGARYIVDLPRFFPEGTVFATTYPAT     | 80  |
| Actinoplanes_sp.N902-109  | VDVNSMTPWDVEEGARYIVDLPRFFPEGTVFATTYPAT      | 78  |
| Nocardia_brasiliensis     | VDICHTMQFPWVEEGARYIVDLPRFFPEGTVFATTYPAT     | 67  |
| Streptomyces_cattleya     | VDVCHSMTPWDVEEGARYIVDLPRFFPEGTVFATTYPAT     | 80  |
| Consensus                 | d h m pw veegaryivdlpr fpegtvfattypat       |     |
|                           |                                             |     |
| Streptomyces_xinghaiensis | GTETRSVAVRIKQAAKGGARGQWAGSAGGFERAEGSYIIV    | 120 |
| Actinopolyspora_mzabensis | GTTARSAVARIKYPAGKGGARGQWAGSGEGFERSEGSYIIV   | 107 |
| Streptomyces_sp.MA37      | GTTTRSAVARIKQAAKGGARGQWAGSGDGFERADGSYIIV    | 120 |
| Actinoplanes_sp.N902-109  | GTATRSVALRIKQAAKGGARGQWAGSAGGFERAEGSYIIV    | 118 |
| Nocardia_brasiliensis     | GTTARSAVALRIAHASKGGARGQWAGSAGGFERKEGSYIIV   | 107 |
| Streptomyces_cattleya     | GTTTRSAVARIKQAAKGGARGQWAGSAGGFERAEGSYIIV    | 120 |
| Consensus                 | gt rsva ri qgaargqwags gfer gsyiy           |     |
|                           |                                             |     |
| Streptomyces_xinghaiensis | APNNGLLTTVLEEHGYIEAYEVSSSTKVIIPERPEPTFYSRE  | 160 |
| Actinopolyspora_mzabensis | APNNGLLTTVLEEHGYIEAYEVSSSTDVVFARPEPTFYSRE   | 147 |
| Streptomyces_sp.MA37      | APNNGLLTTVLEEHGYIEAYEVSTTKVIIPANPEPTFYSRE   | 160 |
| Actinoplanes_sp.N902-109  | APNNGLLTTVIEEHGYIEAYEVSNTKVIIPAEPEPTFYSRE   | 158 |
| Nocardia_brasiliensis     | APNNGLLTTVIEEHGYIEAYEVSSPEVIEPEPEPTFYSRE    | 147 |
| Streptomyces_cattleya     | APNNGLLTTVLEEHGYIEAYEVTSPEKVIIEPEPEPTFYSRE  | 160 |
| Consensus                 | apnngllttv ehgy eayev v p peptfysre         |     |
|                           |                                             |     |
| Streptomyces_xinghaiensis | MVAIPSAHLAAGFPLEVGRRLDSEIVRFHRAVEISGD       | 200 |
| Actinopolyspora_mzabensis | MVAIPSAHLAAGYPLEKVRKQLDSEIVRFPTPQATVSPE     | 187 |
| Streptomyces_sp.MA37      | MVAIPSAHLAAGFPLAEVGRRLDSEIVRFHRAVEISGD      | 200 |
| Actinoplanes_sp.N902-109  | MVAIPSAHLAAGFPLNEVGRRLDSEIVRFHRAVEISGD      | 198 |
| Nocardia_brasiliensis     | MVAIPSAHLAAGFPLEKVRRLADSEIVRFERKDFELVAD     | 187 |
| Streptomyces_cattleya     | MVAIPSAHLAAGFPLEVGRPLEDSEIVRFHRAVEIQDGE     | 200 |
| Consensus                 | mva p ahlag pl vgr l d eivr                 |     |
|                           |                                             |     |
| Streptomyces_xinghaiensis | .TLTGVVSAIDHPFGNVWNTNIHRTDLEKAGIGYGRRIKII   | 239 |
| Actinopolyspora_mzabensis | GDLSCVVTAIDHPFGNIWTSIHHDNLESAAGVGYGTNLKIV   | 227 |
| Streptomyces_sp.MA37      | .ALSCVVTAIDHPFGNIWNTNIHRTDLEKAGIGYGRKHLKII  | 239 |
| Actinoplanes_sp.N902-109  | GVLSCVITNIDHPFGNLWNTNIHRTDLEKAGIGYQTQLRLL   | 238 |
| Nocardia_brasiliensis     | HDLVGYVTNIDHPFGNVWNTNIHRTDLEKLGVGYGTLKIRIT  | 227 |
| Streptomyces_cattleya     | .ALVGVVSAIDHPFGNVWNTNIHRTDLEKAGIGYGARLRLT   | 239 |
| Consensus                 | l g idhpfgn wt ihr le g g                   |     |
|                           |                                             |     |
| Streptomyces_xinghaiensis | LDDVLFPEELIPTTFADAGEIGVAAVYVNSRGYLSIARNA    | 279 |
| Actinopolyspora_mzabensis | LDDVLFPEELIPTTFADAGEVGDVYVYVNSRGYLSIARNA    | 267 |
| Streptomyces_sp.MA37      | LDDVLFPEELIPTTFADAGAIQNIATVYVNSRGYLSIARNA   | 279 |
| Actinoplanes_sp.N902-109  | LDGVITFDLIVPTTFADAGQIGDVIYVNSRGYLSIARNA     | 278 |
| Nocardia_brasiliensis     | LDGVLFPEELIPTTFADAGEIGAAVYVLSRGYLSIARNA     | 267 |
| Streptomyces_cattleya     | LDGVLFPEELIPTTFADAGEIGNIATVYVNSRGYLSIARNA   | 279 |
| Consensus                 | ld v f l ptfadag g y srgyl arna             |     |
|                           |                                             |     |
| Streptomyces_xinghaiensis | ASLAYFYNLRAGLKVRETV                         | 298 |
| Actinopolyspora_mzabensis | ASLAYFYNLRKEGMSVTR                          | 286 |
| Streptomyces_sp.MA37      | ASLAYFYNLRAGLKVREVA                         | 298 |
| Actinoplanes_sp.N902-109  | APLAYFYNLRAGLTVIVTK                         | 297 |
| Nocardia_brasiliensis     | ASLAYFYNLRAGISVQKV                          | 286 |
| Streptomyces_cattleya     | ASLAYFYNLRKEGMSARVEA                        | 298 |
| Consensus                 | a layp lk g v                               |     |

84

85 **Figure S14.** Multiple sequence alignment of fluorinases from different



86 microorganisms. Green: 100% homology level; Pink:  $\geq 75\%$  homology  
87 level; Light green:  $\geq 50\%$  homology level.

88

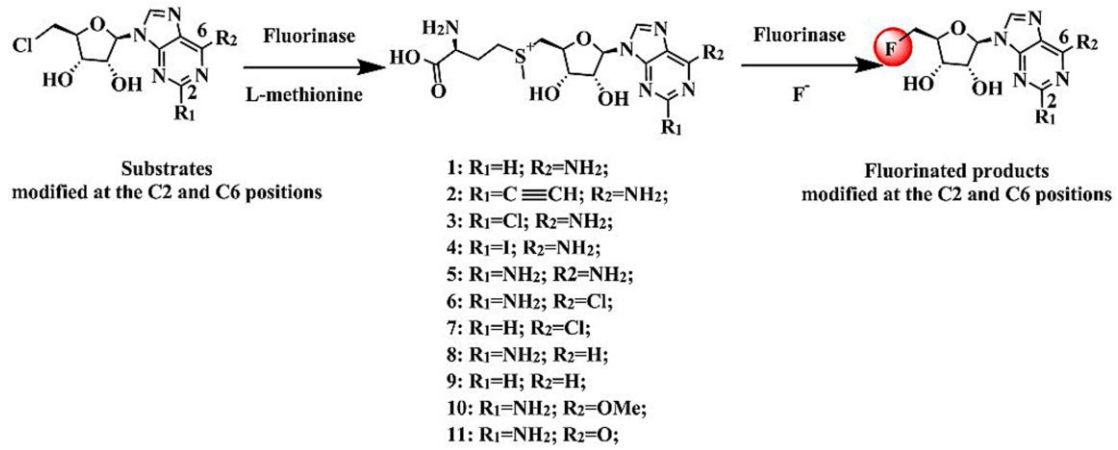

89

90 **Figure S15.** C2 and C6 modified substrates catalyzed by fluorinase.
